# Supplementary material for: GCAT|Genomes for life: a prospective cohort study of the genomes of Catalonia
Source: PubMed Central journal article supplement — BMJ Open. 2018 Mar 27;8(3):e018324. doi: 10.1136/bmjopen-2017-018324 (PMC5875652; doi:10.1136/bmjopen-2017-018324), 2018-03-27
Supplement: bmjopen-2017-018324supp001.pdf [file bmjopen-2017-018324supp001.pdf]

**Supplemental table 1. List of metabolites by type, subtype and method used for compound identification**

| Metabolite                                                                                                                                                                                                                                                                                                                                                                                                                                                                                                    | Type                 | Subtype             | Analysis method |
|---------------------------------------------------------------------------------------------------------------------------------------------------------------------------------------------------------------------------------------------------------------------------------------------------------------------------------------------------------------------------------------------------------------------------------------------------------------------------------------------------------------|----------------------|---------------------|-----------------|
| Glutamic acid                                                                                                                                                                                                                                                                                                                                                                                                                                                                                                 | Amino acids          | Acid                | GC/QTOF         |
| Alanine                                                                                                                                                                                                                                                                                                                                                                                                                                                                                                       | Amino acids          | Aliphatic           | GC/QTOF         |
| Glycine                                                                                                                                                                                                                                                                                                                                                                                                                                                                                                       |                      |                     |                 |
| Valine                                                                                                                                                                                                                                                                                                                                                                                                                                                                                                        |                      |                     |                 |
| Leucine                                                                                                                                                                                                                                                                                                                                                                                                                                                                                                       |                      |                     |                 |
| Isoleucine                                                                                                                                                                                                                                                                                                                                                                                                                                                                                                    |                      |                     |                 |
| Phenylalanine                                                                                                                                                                                                                                                                                                                                                                                                                                                                                                 | Amino acids          | Aromatic            | GC/QTOF         |
| Tyrosine                                                                                                                                                                                                                                                                                                                                                                                                                                                                                                      |                      |                     |                 |
| Tryptophan                                                                                                                                                                                                                                                                                                                                                                                                                                                                                                    |                      |                     |                 |
| Lysine                                                                                                                                                                                                                                                                                                                                                                                                                                                                                                        | Amino acids          | Basic               | GC/QTOF         |
| Proline                                                                                                                                                                                                                                                                                                                                                                                                                                                                                                       | Amino acids          | Cyclic              | GC/QTOF         |
| Serine                                                                                                                                                                                                                                                                                                                                                                                                                                                                                                        | Amino acids          | Hydroxyl-containing | GC/QTOF         |
| Threonine                                                                                                                                                                                                                                                                                                                                                                                                                                                                                                     |                      |                     |                 |
| Ornithine                                                                                                                                                                                                                                                                                                                                                                                                                                                                                                     | Amino acids          | Non-proteinogenic   | GC/QTOF         |
| Methionine                                                                                                                                                                                                                                                                                                                                                                                                                                                                                                    | Amino acids          | Sulfur-containing   | GC/QTOF         |
| Sucrose                                                                                                                                                                                                                                                                                                                                                                                                                                                                                                       | Carbohydrates        | Disaccharides       | GC/QTOF         |
| Glyceric acid                                                                                                                                                                                                                                                                                                                                                                                                                                                                                                 | Carbohydrates        | Glyceric acids      | GC/QTOF         |
| Fructose, Glucose                                                                                                                                                                                                                                                                                                                                                                                                                                                                                             | Carbohydrates        | Monosaccharides     | GC/QTOF         |
| Glycerol                                                                                                                                                                                                                                                                                                                                                                                                                                                                                                      | Carbohydrates        | Sugar alcohols      | GC/QTOF         |
| Citric acid                                                                                                                                                                                                                                                                                                                                                                                                                                                                                                   | Carboxylic acids     | Citrates            | GC/QTOF         |
| 2-Hydroxybutanoic acid                                                                                                                                                                                                                                                                                                                                                                                                                                                                                        | Carboxylic acids     | Hydroxybutirates    | GC/QTOF         |
| 3-Hydroxybutanoic acid                                                                                                                                                                                                                                                                                                                                                                                                                                                                                        |                      |                     |                 |
| Lactic acid                                                                                                                                                                                                                                                                                                                                                                                                                                                                                                   | Carboxylic acids     | Lactates            | GC/QTOF         |
| PC 30:0, PC 31:0, PC 32:0, PC 32:1, PC 32:1 e, PC 32:2, PC 33:0, PC 33:1, PC 34:0, PC 34:1, PC 34:1, PC 34:2, PC 34:2 e, PC 34:3, PC 34:3 e, PC 34:4, PC 35:1, PC 35:2, PC 35:4, PC 36:0, PC 36:1, PC 36:2, PC 36:2 e, PC 36:3, PC 36:3 e, PC 36:4, PC 36:4 e, PC 36:5, PC 36:5 e, PC 37:4, PC 37:6, PC 38:2, PC 38:3, PC 38:3 e, PC 38:4, PC 38:4 e, PC 38:5, PC 38:5 e, PC 38:6, PC 38:6 e, PC 40:4, PC 40:4 e, PC 40:5, PC 40:5 e, PC 40:6, PC 42:4 e, PC 42:5 e, PE 36:4, PE 36:5 e, PE 38:5 e, PE 38:6 e | Glycerophospholipids | LC/QTOF             |                 |

|                                                                                                                                                                                                                                             |                          |               |         |
|---------------------------------------------------------------------------------------------------------------------------------------------------------------------------------------------------------------------------------------------|--------------------------|---------------|---------|
| Arachidonic Acid (ARA+EPA)                                                                                                                                                                                                                  |                          |               |         |
| Docosahexaenoic acid (DHA)                                                                                                                                                                                                                  |                          |               |         |
| Polyunsaturated fatty acids (PUFA)                                                                                                                                                                                                          |                          |               |         |
| Monounsaturated fatty acids (MUFA)                                                                                                                                                                                                          |                          |               |         |
| Palmitic acid                                                                                                                                                                                                                               |                          |               |         |
| Linoleic acid                                                                                                                                                                                                                               | Lipids                   | Fatty acids   | NMR     |
| Oleic acid                                                                                                                                                                                                                                  |                          |               |         |
| Stearic acid                                                                                                                                                                                                                                |                          |               |         |
| Fatty acyl chains                                                                                                                                                                                                                           |                          |               |         |
| Omega-3                                                                                                                                                                                                                                     |                          |               |         |
| Phosphatidyl Choline                                                                                                                                                                                                                        |                          |               |         |
| Lysophosphatidyl Choline                                                                                                                                                                                                                    | Lipids                   | Phospholipids | NMR     |
| Sphingomyelin                                                                                                                                                                                                                               |                          |               |         |
| Cholesterol                                                                                                                                                                                                                                 | Lipids                   | Sterols       | GC/QTOF |
| alpha-Tocopherol                                                                                                                                                                                                                            | Lipids                   | Vitamin E     | GC/QTOF |
| LPC 14:0, LPC 15:0, LPC 16:0m, LPC 16:0 em,<br>LPC 16:1, LPC 16:1 e, LPC 17:0, LPC 18:0, LPC<br>18:0 e, LPC 18:1, LPC 18:2, LPC 18:3, LPC 18:4,<br>LPC 20:0, LPC 20:1, LPC 20:2, LPC 20:3, LPC<br>20:4, LPC 20:5, LPC 22:5,LPC 22:6         | Lysophosphatidylcholines |               | LC/QTOF |
| SM 32:0, SM 32:1, SM 32:2, SM 33:1, SM 34:1,<br>SM 34:2, SM 35:0, SM 35:1, SM 36:0, SM 36:1,<br>SM 36:2, SM 38:1, SM 38:2, SM 39:1, SM 40:0,<br>SM 40:1, SM 40:2, SM 41:1, SM 41:2, SM 42:1,<br>SM 42:2, SM 42:3, SM 43:1, SM 43:2          | Sphingomyelins           |               | LC/QTOF |
| TG 46:0, TG 46:1, TG 46:2, TG 48:0, TG 48:1,<br>TG 48:2, TG 48:3, TG 50:0, TG 50:1, TG 50:2, TG<br>50:3, TG 50:4, TG 51:2, TG 52:1, TG 52:2, TG<br>52:3, TG 52:4, TG 52:5, TG 52:6, TG 54:2, TG<br>54:3, TG 54:4, TG 54:5, TG 54:6, TG 54:7 | Triglycerides            |               | LC/QTOF |
| Triglycerides                                                                                                                                                                                                                               | Triglycerides            |               | NMR     |

LC/QTOF, liquid chromatography in combination with hybrid quadrupole time-of-flight mass spectrometry; NMR, nuclear magnetic resonance; GC/QTOF, gas chromatography in combination with hybrid quadrupole time-of-flight mass spectrometry
